# Supplementary material
Source: Springer Nature journal article supplement (https://www.springermedizin.de/resource/supplementary/12889_2010_3039_MOESM3_ESM.pdf/9487936)

Mean Drunkenness

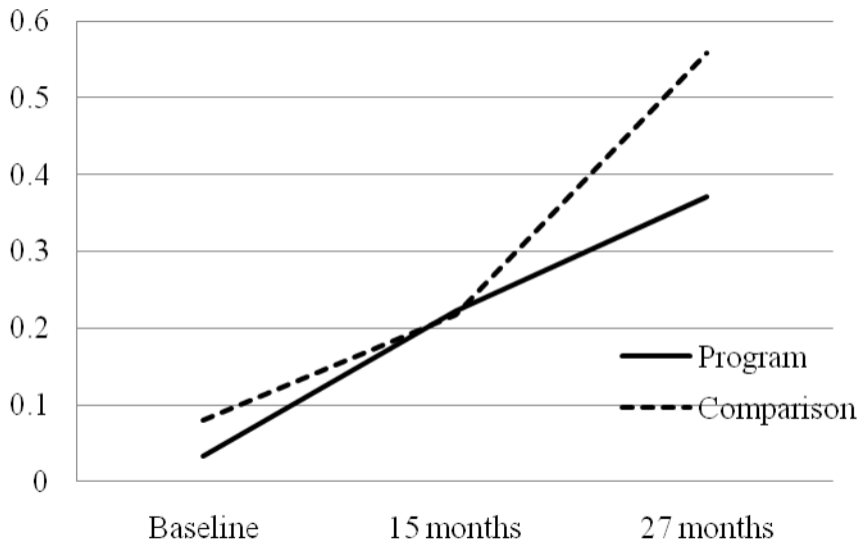

Supplement: MOESM3 [file 9487936]
